# Supplementary material for: Extremely low nucleotide diversity among thirty-six new chloroplast genome sequences from Aldama (Heliantheae, Asteraceae) and comparative chloroplast genomics analyses with closely related genera
Source: PeerJ. 2021 Feb 24;9:e10886. doi: 10.7717/peerj.10886 (PMC7912680; doi:10.7717/peerj.10886)
Supplement: Supplemental Information 8 [file peerj-09-10886-s008.xlsx]

## Sheet: Feuil1
Species	Origin / Voucher / Herbarium	Location	Longitude	Latitude
Aldama anchusifolia (DC.) E.E.Schill. & Panero	Filartiga 8 / ESA	Brazil, Rio Grande do Sul, Eldorado	-51.6161	-30.0839
A. arenaria 1 (Baker) E.E.Schill. & Panero	Magenta 275 / SPF	Brazil, São Paulo, Itapirina	-47.8894	-22.2030
A. arenaria 2 (Baker) E.E.Schill. & Panero	Magenta 383 / SPF	Brazil, São Paulo, Itapirina	-47.8247	-22.2827
A. aspilioides (Baker) E.E.Schill. & Panero	Filartiga 18 / ESA	Brazil, Paraná, Ponta Grossa	-50.1619	-25.0950
A. bakeriana (S.F.Blake) E.E.Schill. & Panero	Loeuille 867 / SPF	Brazil, Minas Gerais, Santana do Riacho	-43.5879	-19.3431
A. bracteata (Gardner) E.E.Schill. & Panero	Filartiga 15 / ESA	Brazil, Goiás, Alto Paraíso de Goiás	-47.5100	-14.1325
A. canescens (B.L. Rob.) E.E.Schill. & Panero	Schilling 17 / TENN	Mexico, San Luis Potosí, Las Tablas	-99.8600	22.35
A. corumbensis (Malme) Magenta & Pirani	Loeuille 909 / SPF	Brazil, Mato Grosso do Sul, Ladário	-57.6017	-19.0047
A. dentata 1 La Llave	Schilling 331 / TENN	Mexico, Morelos, Puenta de Ixtla	-99.3600	18.6100
A. dentata 2 La Llave	Schilling 333 / TENN	Mexico, Morelos, Puenta de Ixtla	-99.3600	18.6100
A. discolor (Baker) E.E.Schill. & Panero	Bombo 72 / ESA	Brazil, Minas Gerais, Uberlândia	-48.2771	-18.9186
A. excelsa (Willd.) E.E.Schill. & Panero	Schilling H2481 / TENN	Mexico,Guerrero, Chilpa-Talpa Road	-	-
A. filifolia (Sch.Bip. ex Baker) E.E.Schill. & Panero	Loeuille 849 / SPF	Brazil, Goiás, Alto Paraíso de Goiás	-47.5238	-14.0085
A. fusiformis (S.F.Blake) E.E.Schill. & Panero	Siniscalchi 398 / SPF	Peru, Cuzco, Paucartambo	-71.7638	-13.3310
A. gardneri (Baker) E.E.Schill. & Panero	Filartiga 16 / ESA	Brazil, Goiás, Cavalcante	-47.4583	-13.7975
A. goyazii E.E.Schill. & Panero	Magenta 716 / SPF	Brazil, Minas Gerais, Prata	-49.1192	-18.9522
A. grandiflora (Gardner) E.E.Schill. & Panero	Loeuille 750 / SPF	Brazil, Goiás, Alto Paraíso de Goiás	-47.4768	-14.1247
A. kunthiana (Gardner) E.E.Schill. & Panero	Silva s.n. / ESA 122873	Brazil, Goiás, Niquelândia	-48.4597	-14.4739
A. linearis (Cav.) E.E.Schill. & Panero	Schilling 70 / TENN	Mexico, Zacatecas, Fresnillo	-102.93	23.26
A. macrorhiza (Baker) E.E.Schill. & Panero	Magenta 476 / SPF	Brazil, São Paulo, Mogi Guaçu	-47.1883	-22.2036
A. megapotamica (Malme) Magenta & Pirani	Magenta 502 / SPF	Brazil, Rio Grande do Sul, Arroio dos Ratos	-51.8767	-30.1928
A. nudibasilaris (S.F. Blake) E.E.Schill. & Panero	Filartiga 1 / ESA	Brazil, Minas Gerais, Santo Antônio do Amparo	-44.9189	-20.9464
A. nudicaulis (Baker) E.E.Schill. & Panero	Loeuille 734 / SPF	Brazil, Rio Grande do Sul, Pinheiro Machado	-53.4491	-31.5405
A. pilosa (Baker) E.E.Schill. & Panero	Filartiga 10 / ESA	Brazil, Rio Grande do Sul, Caxias do Sul	-51.1794	-29.1681
A. revoluta (Meyen) E.E.Schill. & Panero	Loeuille 799 / SPF	Chile, Región de O'Higgins, Coya	-70.4089	-34.2438
A. robusta (Gardner) E.E.Schill. & Panero	Bringel 985 / UB	Brazil, Goiás, Alto Paraíso de Goiás	-47.5100	-14.0930
A. rubra (Magenta & Pirani) E.E.Schill. & Panero	Magenta 388 / SPF	Brazil, São Paulo, Pirassununga	-47.4983	-21.9620
A. santacatarinensis (H.Rob. & A.J.Moore) E.E.Schill. & Panero	Magenta 706 / SPF	Brazil, Santa Catarina, São José dos Ausentes	-50.0658	-28.7483
A. squalida (S.Moore) E.E.Schill. & Panero	Loeuille 790 / SPF	Brazil, Mato Grosso do Sul, São Gabriel do Oeste	-54.5664	-19.3953
A. tenuifolia (Gardner) E.E.Schill. & Panero	Silva s.n. / ESA 122870	Brazil, Minas Gerais, Capitólio	-46.0500	-20.6153
A. trichophylla 1 (Dusén) Magenta	Magenta 390 / SPF	Brazil, Paraná, Curitiba	-49.2439	-25.4367
A. trichophylla 2 (Dusén) Magenta	Magenta 561 / SPF	Brazil, Paraná, Jaguariaíva	-49.6369	-24.2206
A. tuberosa (Griseb.) E.E.Schill. & Panero	Loeuille 719 / SPF	Brazil, Rio Grande do Sul, Alegrete	-55.3944	-29.6633
A. tucumanensis (Hook. & Arn.) E.E.Schill. & Panero	Heiden 1837 / SPF	Argentina, Mendoza, Las Heras	-69.035	-32.5211
A. veredensis (Magenta & Pirani) E.E.Schill. & Panero	Loeuille 921 / SPF	Brazil, Minas Gerais, Chapada Gaúcha	-45.9384	-15.3805
A. vernonioides (Baker) E.E.Schill. & Panero	Magenta 460 / SPF	Brazil, Mato Grosso, Jaciara	-55.3280	-15.9542
Outgroups
Dimerostemma asperatum S.F.Blake	Siniscalchi 440 / SPF	Brazil, Minas Gerais, São Roque de Minas	-46.4945	-20.2206
Helianthus tuberosus L.	Loeuille 793 / SPF	Chile, Región de O'Higgins, Graneros	-70.7411	-33.9340
Iostephane heterophylla (Cav.) Benth.	Schilling 94 / TENN	Mexico, Jalisco, Volcán Tequila	-103.85	20.80
Pappobolus lanatus var. lanatus (Heiser) Panero	Siniscalchi 386 / SPF	Peru, Lima, San Mateo	-76.2890	-11.7454
Tithonia diversifolia (Hemsl.) A.Gray	Loeuille 678 / SPF	Brazil, Bahia, Laje	-39.3875	-13.1718
